# Supplementary material
Source: PubMed Central journal article supplement (PMC2946185)
Supplement: NIHMS96718-supplement-01.pdf [file NIHMS96718-supplement-01.pdf]

## F) Supplemental Text and Figures

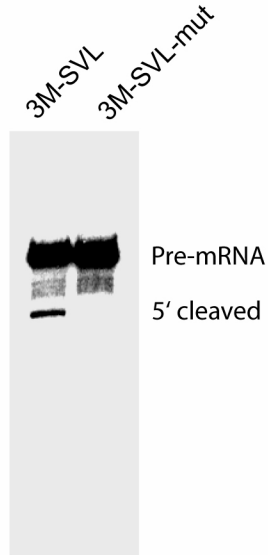

**Figure S1. Mutant RNA substrates are defective in 3' cleavage.** 3M-SVL and 3M-SVL-mut RNA substrates were used in cleavage assays. Purified RNAs were resolved by 6% denaturing gel and visualized by phosphorimager. Pre-mRNA and the 5' cleaved product were marked.

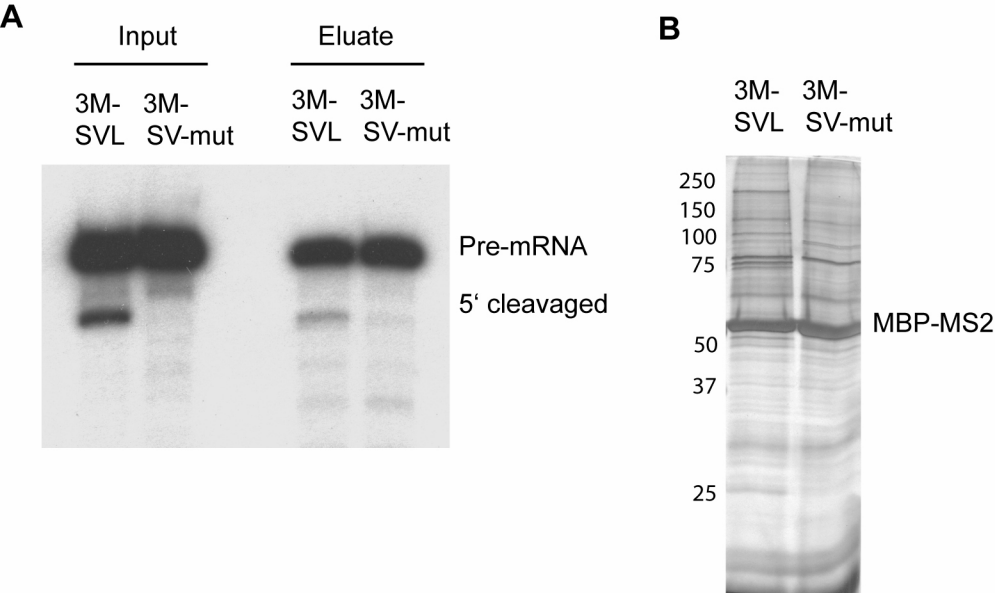

**Figure S2. Purification of 3' processing complexes assembled under cleavage conditions.**

A. 3M-SVL or mutant (3M-SVL mut) RNAs were isolated from input cleavage reaction mixtures (input) or from eluted complexes after affinity purification (eluate), resolved on a 6% denaturing gel, and visualized by using a phosphorimager. Pre-mRNA and the 5' cleaved products were marked. B. Proteins in complexes assembled on 3M-SVL or mutant (3M-SVL mut) RNAs after affinity purification were resolved on SDS-PAGE and visualized by silver staining. The position of the MBP-MS2 protein is marked.

Figure S3. Unique peptides from WDR33 detected in mass spectrometry analyses of the CPSF73 complex.

>gi|56243590|ref|NP\_060853.3| WD repeat domain 33 isoform 1 [Homo sapiens]

MATEIGSPRRFFHMPRFQHQAAPRQLFYKRPDFAQQQAMQQLTFDGKRMKAVNRKKTIDYN  
PSVIKYLENRIWQRDQORDMRRAIQPDAGYYNDLVPPIGMLNNPMNAVTTKFVRTSTNKVKC  
PVFVVRWTPEGRRLVTGASSGEFTLWNGLTFNFETILOAHDSPVRAMTWSHNDMWMLTAD  
HGGYVKYWQSNMNNVKMFQAHKEAIREASFSPDKNKFATCSDDGTVRIWDFLRCHEERIL  
RGHGADVCKVDWHPTKGLVVSQSKDSQQPIKFWDPKTGQSLATLHAHKNTVMEVKLNLNG  
NWLLTASRDHLCCKLFDIRNLKEELOVFRGHKKEATAVAWHPVHEGLFASGGSDGSLLFWH  
VGVEKEVGGMEMAHEGMIWSLAWHPLGHILCSGSNDHTSKFWTRNRPGDKMRDRYNLL  
PGMSEDGVEYDDLEPNSLAVIPGMGIPEQLKLAMEQEOMGKDESNEIEMTIPGLDWGMEE  
VMOKDQKKVPQKKVPYAKPIPAQFOQAWMONKVPIPAPNEVLNDRKEDIKLEEKKKTOAE  
IEQEMATLOYTNPOLLEQLKIERLAQKQVEQIQPPSSGTPLLGPQPFPGOGPMSQIQG  
FQQPHPSQQMPMNMAQMGPQGGQFRPPGPQGMGPQGPPLHQGGGGPQGFMPQGPQ  
PPQGLPRPQDMHGPOGMQRHPGPHGPLGPQGPQGSQGMGPQGMGPQGHIGPO  
GPPGPQGHLPQGPQGTQGMQGGPPGPRGMQGPPHPHGIQGGPGSQGIQGPVSOGPLMGLN  
PRGMQGPQGPRENQGPAPQGMIMGHPPQEMRGPHPPGGLLGHGPQEMRGPOEIRGMQGP  
POGSMLGPPQELRGPPGSOSQOGPPQGSGLGPPQGGMOGPPGPQGOONPARGPHPSQGP  
PFQOQKTPLLGDGPRAPFNOEGOSTGPPPLIPGLGOOGAOGRIPPLNPGOGPGPNKGD  
SRGPPNHHMGPMSERRHEQSGGPEHGPERGPFRRGGQDCRGPPDRRGPHPDFPDDFSRPDDFH  
PDKRFRGHRLREFEGRGGPLQEEKWRRGPGPPFPDPHREFSEGDRGAARRGPPGAWEGR  
RPGDERFPRDPEDPRFRGRREESFRRGAPPRHEGRAPPRGRDGFPGPEDFGPEENFDASE  
EAARGRDLRGRGRGTPRGGRKGLLPTPDEFPRFEGGRKPDSDWGNREPGPGHEHFRDTPR  
PDHPPHDGHSPASRERSSSLOGMDMASLPPRKRPWHDGPGTSEHREMEAPGGPSEDRGGK  
GRGGPGPAQRVPKSGRSSSLDGEHHDGYHRDEPFGGPPGSGTSPRGGRSGSNWGRGSNMN  
SGPPRRGASRGGGRGR

\*Sequences covered by unique peptides detected by mass spectrometry were underlined.

\*Total number of unique peptides detected: 55

\*Total number of spectrum: 521

\*Coverage: 38.4%

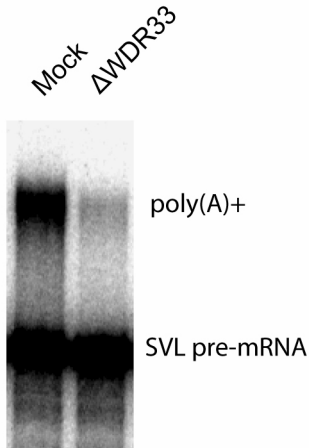

**Figure S4. Depletion of WDR33 abolishes polyadenylation.**

Mock-depleted (mock) and WDR33-depleted ( $\Delta$ WDR33) NE were used in polyadenylation assays with SVL substrate. Purified RNAs were resolved on a 6% denaturing gel and visualized using a Phosphorimager. Pre-mRNA and poly(A)+ RNAs are marked.

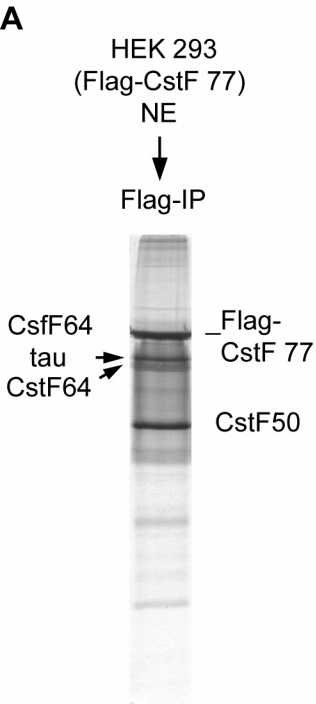

**B**

>gi|14149675|ref|NP\_056050.1| CstF 64, tau [Homo sapiens]

MSSLAVRDPAMDRSLRSVFVGNIPYEATEEOLKDIFSEVGSVVSFRL  
 VYDRETGKPKKGYGFCEYQDQETALSAMRNLNGREFSGRALRVDNAAS  
 EKNKEELKSLGPAAPIIDSPYGDPI DPEDAPESITRAVASLPPEQMF  
ELMKQMKLCVQNSHQEARARNMLLQNPQLAYALLQAQVVMRIMDPEIAL  
KILHRKIHVTPLIPGKSQSVSVSGPGPGPGPLCPGPNVLLNQNP  
APQPQHLARRPVKDIPPLMQTPIQGGIPAPGPIPAAVPGAGPGSLTP  
GGAMQPQLGMPGVGPVPLERGQVQMSDPRAPIPRGPVTPGGLP  
PRGL  
LGDAPNDPRGGTLLSVTGEVEPRGYLGPPHQGPPMHASGHDRGPS  
 SHEMRGGPLGDPRLLLIGEPRGPMIDQRGLPMDGRGGRDSRAMETTRAM  
ETEVLETRVMERRGMETCAMETRGMEARGMDARGLEMGRPVPSSRG  
MP  
MTGGIQGPGPINIGAGGPPQGPRQVPGISGVGNPGAGMQGTGIQGTG  
 MQGAGIQGGMQGAGIQGVSIQGGGIQGGGIQGASKQGGSQSSSFSP  
GQSQVTPQDQEKAALIMQVLQLTADQIAMLPPEQRQSILILKEQIQK  
 STGAS

\*Sequences covered by unique peptides detected by mass spectrometry were underlined.

\*Total number of unique peptides detected: 50

\*Total number of spectrum: 1013

\*Coverage: 56.3%

**Figure S5. CstF64 tau is a component of the CstF complex.**

(A) Immuno-purification of the CstF complex. NE was made from a stable HEK293 cell line expressing Flag-CstF77, and IP was performed using anti-Flag antibodies. Purified proteins were resolved and stained with silver. CstF components are marked.

(B) Mass spectrometry analyses of the CstF complex detect CstF64 tau.

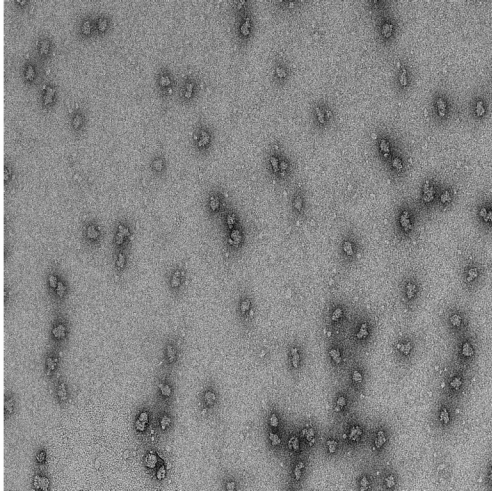

**Figure S6. Tilted image of the negatively stained 3' processing complexes.**  
A 50° tilted image of the negatively stained particles. The tilted images indicate that the sample is fully sandwiched between carbon membranes, and the staining seems homogeneous.

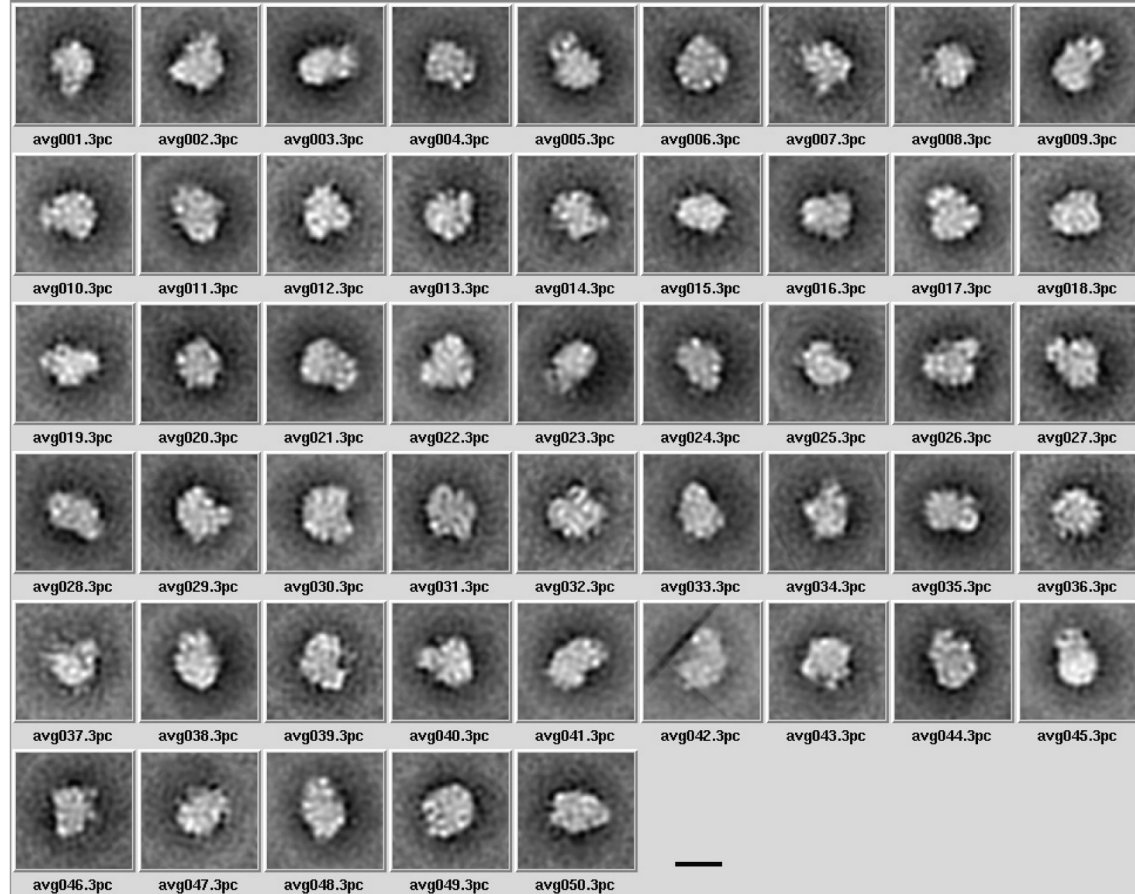

**Figure S7. Class average images of the 3' processing complex using SPIDER.**

3,671 images of negatively stained single particles were classified into 50 groups and class averages were obtained after reference-free alignment using SPIDER. Scale bar, 20nm.

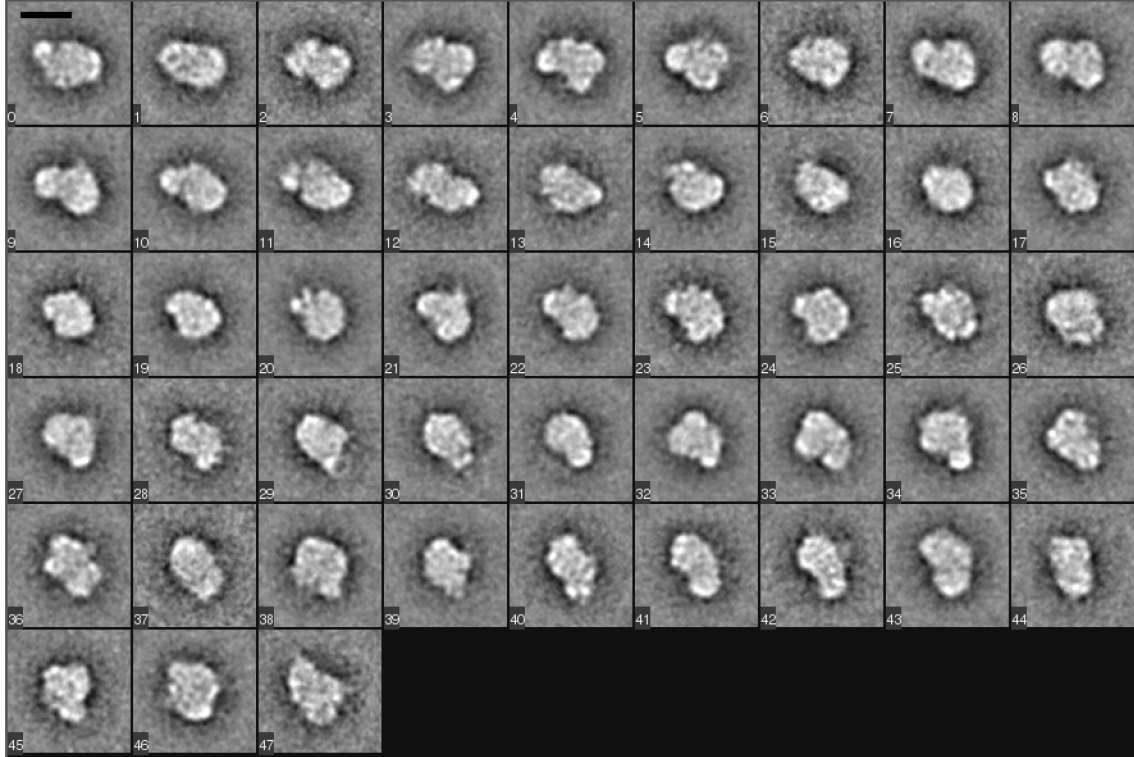

**Figure S8. Class average images of the 3' processing complex obtained with EMAN.** 3,671 images of negatively stained single particles were classified into 47 groups (~40-110 particles in each group) and class averages were obtained after reference-free alignment using EMAN. Scale bar, 10nm.



**Table S1. Protein composition of the human pre-mRNA  
Cleavage complexes**

| Protein Name                       | Accession # | Mol. Weight | # peptides |     |
|------------------------------------|-------------|-------------|------------|-----|
|                                    |             |             | L3         | SVL |
| CPSF160                            | NP_037423   | 160822      | 18         | 17  |
| CPSF100                            | gi_51338827 | 88487       | 15         | 9   |
| CPSF73                             | NP_057291   | 77486       | 5          | 3   |
| CPSF30                             | NP_006684   | 30124       | 1          | 0   |
| hFip1                              | NP_112179   | 66526       | 12         | 12  |
| CstF77                             | NP_001317   | 82922       | 16         | 16  |
| CstF64                             | NP_001316   | 60959       | 12         | 10  |
| CstF50                             | NP_001315   | 48358       | 5          | 6   |
| CF Im 25                           | NP_008937   | 26227       | 14         | 7   |
| CF Im 59                           | NP_079087   | 52050       | 11         | 5   |
| CF Im 68                           | NP_008938   | 59209       | 12         | 7   |
| Symplekin                          | NP_004810   | 126500      | 11         | 3   |
| PABP 1                             | NP_002559.1 | 70324       | 5          | 1   |
| WDR33                              | NP_060853   | 145921      | 10         | 7   |
| RBBP6                              | NP_008841   | 201563      | 6          | 0   |
| PP1 beta                           | NP_002700   | 37187       | 1          | 3   |
| DNA topIIalpha                     | NP_001058   | 174384      | 4          | 5   |
| PARP1                              | NP_001609   | 113135      | 5          | 2   |
| DNA-PK                             | NP_008835   | 469093      | 14         | 8   |
| Ku 70                              | NP_001460   | 69843       | 4          | 2   |
| Ku 86                              | NP_066964   | 82705       | 5          | 3   |
| MDC1                               | NP_055456   | 226643      | 1          | 1   |
| THO complex subunit 4              | NP_005773   | 26757       | 3          | 4   |
| THO complex subunit 6              | AAH03118    | 32891       | 1          | 1   |
| FACT complex large subunit         | NP_003137   | 119914      | 2          | 2   |
| NELF B subunit (BRCA1 coactivator) | NP_060853   | 61640       | 2          | 9   |
| NELF E subunit                     | NP_002895.3 | 43240       | 1          | 1   |
| BAF53a                             | NP_004292   | 47461       | 1          | 2   |
| BRG1/SMARCA4                       | NP_003063   | 184644      | 1          | 1   |
| BAF170                             | NP_003066   | 132879      | 1          | 0   |
| BAF155                             | NP_003065   | 122753      | 1          | 0   |
| BAF60b/SMARCAD                     | NP_003068   | 54945       | 1          | 0   |
| Enhancer of rudimentary            | NP_004441   | 12259       | 1          | 2   |

|                                                                 |             |        |   |   |
|-----------------------------------------------------------------|-------------|--------|---|---|
| homolog (repressor)                                             |             |        |   |   |
| Bre1A                                                           | NP_149974   | 113977 | 1 | 3 |
| U1-70K                                                          | NP_003080   | 70082  | 2 | 1 |
| U4/U6.U5 tri-snRNP associated protein 1                         | NP_055317   | 55181  | 4 | 2 |
| U4/U6.U5 tri-snRNP associated protein 2                         | NP_005137   | 90255  | 1 | 2 |
| SF3b155 (SAP155)                                                | NP_036565   | 145815 | 6 | 3 |
| P54/NRB                                                         | NP_004759   | 53542  | 1 | 2 |
| ASF/SF2                                                         | NP_008855   | 27745  | 1 | 2 |
| SR-A1                                                           | NP_067051   | 139296 | 1 | ? |
| SRp38                                                           | NP_473357   | 31345  | 1 | 1 |
| SRp86 (SR12)                                                    | NP_631907   | 71650  | 1 | 2 |
| SRm300                                                          | NP_057417   | 299676 | 6 | 3 |
| (KSRP) KH-type splicing regulatory protein (also mRNA turnover) | NP_003676   | 73161  | 2 | 2 |
| hnRNPA0                                                         | NP_006796.1 | 30841  | 4 | 1 |
| hnRNP A3                                                        | NP_005749.1 | 29357  | 4 | 2 |
| hnRNP U-like (E1B5-associate protein 5)                         | NP_008971.2 | 95739  | 3 | 2 |
| hnRNP D                                                         | NP_005454.1 | 46437  | 2 | 1 |
| RNA helicase A (DEAD/H box-9)                                   | NP_001348   | 142069 | 7 | 1 |
| DEAD/H box-39                                                   | NP_005795.2 | 49130  | 2 | 1 |
| DEAD/H box-49                                                   | NP_-61943   | 54226  | 1 | 1 |
| DEAH box-8                                                      | NP_004932   | 139314 | 1 | 1 |
| DEAD box-21                                                     | NP_004719   | 87344  | 2 | 2 |
| DEAD/H box-15                                                   | NP_001349   | 92829  | 2 | 2 |
| DEAD box 42                                                     | NP_987095   | 102975 | 1 | 1 |
| Exosome 10                                                      |             | 100831 | 3 | 1 |
| RRP4                                                            |             | 32789  | 0 | 1 |
| RRP40                                                           |             | 29441  | 0 | 1 |
| RRP41                                                           |             | 26252  | 2 | 0 |
| RRP42                                                           |             | 31835  | 1 | 0 |
| RRP43                                                           |             | 30040  | 1 | 0 |
| EEF1-alpha                                                      | NP_001393   | 50141  | 3 | 2 |
| EEF1-epsilon                                                    | NP_004271.1 | 37974  | 1 | 1 |
| EIF 4B                                                          | NP_001408   | 69224  | 4 | 2 |
| 40S ribosomal protein S5                                        | NP_001000.2 | 22745  | 1 | 1 |
| 40S ribosomal                                                   | NP_001008.1 | 17091  | 1 | 2 |

|                                                       |             |        |   |   |
|-------------------------------------------------------|-------------|--------|---|---|
| protein S13                                           |             |        |   |   |
| 40S ribosomal protein S24                             | NP_148982.1 | 15069  | 1 | 1 |
| 40S ribosomal protein S26                             | NP_001020.2 | 13015  | 1 | 1 |
| Similar to 60S ribosomal protein L7a                  | NP_000963.1 | 29996  | 1 | 1 |
| 60S ribosomal protein L8                              | NP_000964.1 | 28025  | 2 | 2 |
| 60S ribosomal protein L9                              | NP_000652.2 | 21863  | 2 | 1 |
| 60S ribosomal protein L24                             | NP_000977.1 | 17779  | 2 | 1 |
| 60S ribosomal protein L27                             | NP_000979.1 | 15798  | 1 | 1 |
| zinc finger CCHC domain-containing protein 8 (ZCCHC8) | NP_060082   | 79375  | 8 | 3 |
| Scaffold attachment factor B                          | NP_002958.2 | 102768 | 3 | 2 |
| TAR DNA-binding protein                               | NP_031401.1 | 33730  | 3 | 2 |
| Lamin-A/C                                             | NP_005563.1 | 74140  | 3 | 2 |
| Clathrin heavy chain                                  | NP_004850   | 191613 | 3 | 5 |
| Lamina-associated polypeptide 2 alpha (Thymopoietin)  | NP_003267.1 | 75361  | 3 | 2 |
| Phenylalanyl-tRNA synthetase beta                     | NP_00678.2  | 66130  | 1 | 1 |

\*Components of multi-subunit complexes that are present in only one purified complex are listed and lightly shaded.

**Table S2: Protein compositions of the CPSF and CstF subcomplexes, and comparison with that of the human pre-mRNA 3' processing complex.**

| Protein Name                         | Accession # | Yeast homolog | Motifs        | Cal. Mass | # of peptides |     |              |             |
|--------------------------------------|-------------|---------------|---------------|-----------|---------------|-----|--------------|-------------|
|                                      |             |               |               |           | L3            | SVL | CPSF73-3Flag | Flag-CstF77 |
| <b>KNOWN POLYADENYLATION FACTORS</b> |             |               |               |           |               |     |              |             |
| <i>CPSF Complex</i>                  |             |               |               |           |               |     |              |             |
| CPSF160 (CPSF1)                      | NP_037423   | CFT1          | SFT1          | 160822    | 80            | 72  | 87           | 22          |
| CPSF100 (CPSF2)                      | NP_059133.1 | CFT2          | $\beta$ -CASP | 88487     | 59            | 52  | 83           | 24          |
| CPSF73 (CPSF3)                       | NP_057291   | YSH1          | $\beta$ -CASP | 77486     | 42            | 22  | 81           | 9           |
| CPSF30 (CPSF4)                       | NP_006684   | YTH1          | Zinc finger   | 30124     | 18            | 13  | 19           | 2           |
| hFip1                                | NP_112179   | FIP1          |               | 66526     | 23            | 19  | 35           | 13          |
| <i>CstF Complex</i>                  |             |               |               |           |               |     |              |             |
| CstF77 (CSTF3)                       | NP_001317   | RNA14         | HAT           | 82922     | 60            | 54  | 3            | 118         |
| CstF64 (CSTF2)                       | NP_001316   | RNA15         | RRM           | 60959     | 31            | 22  | 11           | 45          |
| CstF50 (CSTF1)                       | NP_001315   |               | WD repeats    | 48358     | 21            | 18  | 0            | 48          |
| <i>CF Im Complex</i>                 |             |               |               |           |               |     |              |             |
| CF Im 68 (CPSF6)                     | NP_008938   |               | RRM           | 59209     | 15            | 10  | 0            | 0           |

|                                                               |             |                                   |              |        |    |    |    |    |
|---------------------------------------------------------------|-------------|-----------------------------------|--------------|--------|----|----|----|----|
| CF Im 59                                                      | NP_079087   |                                   | RRM          | 52050  | 15 | 12 | 0  | 0  |
| Cf Im 25 (CPSF5)                                              | NP_008937   |                                   |              | 26227  | 26 | 21 | 0  | 0  |
| <b><i>CF II<sub>m</sub> Complex</i></b>                       |             |                                   |              |        |    |    |    |    |
| Pcf11                                                         | NP_056969.2 | PCF11                             | CID          | 173050 | 5  | 3  | 0  | 0  |
| <b><i>Other known polyadenylation factors</i></b>             |             |                                   |              |        |    |    |    |    |
| Symplekin                                                     | NP_004810   | PTA1                              |              | 126500 | 51 | 39 | 31 | 0  |
| Symplekin variant                                             | BAE06092.1  |                                   |              | 118793 | 48 | 38 | 33 | 0  |
| PAPOLG                                                        | NP_075045   | PAP                               | RRM          | 82803  | 2  | 3  | 0  | 0  |
| PABPC1                                                        | NP_002559.2 | PAB1                              | RRM          | 70671  | 27 | 33 | 3  | 0  |
| PABPC4                                                        | NP_003810.1 |                                   | RRM          | 70783  | 20 | 23 | 3  | 0  |
| PABPN1                                                        | NP_004634   |                                   | RRM          | 31749  | 14 | 12 | 0  | 0  |
| <b>(Putative) homologues of yeast polyadenylation factors</b> |             |                                   |              |        |    |    |    |    |
| CstF64 tau (CSTF2T)                                           | NP_056050.1 | SPAC644.16<br>( <i>S. pombe</i> ) | RRM          | 64436  | 21 | 16 | 8  | 50 |
| WDR33                                                         | NP_060853   | PFS2                              | WD repeats   | 145921 | 49 | 45 | 55 | 10 |
| RBBP6                                                         | NP_008841   | MPE1                              | RS, DWNN     | 201563 | 4  | 3  | 0  | 0  |
| PP1 alpha                                                     | NP_002699.1 | GLC7                              | Phosphatase  | 37512  | 2  | 7  | 2  | 0  |
| PP1 beta                                                      | NP_002700   | GLC7                              | Phosphatase  | 37187  | 2  | 5  | 0  | 0  |
| <b>DNA Damage Response Factors</b>                            |             |                                   |              |        |    |    |    |    |
| DNA-PK                                                        | NP_008835   |                                   | Kinase       | 469093 | 21 | 15 | 0  | 0  |
| Ku 70                                                         | NP_001460   | YKU70                             | DNA helicase | 69843  | 4  | 7  | 0  | 0  |
| Ku 86/XRCC5                                                   | NP_066964   | YKU86                             | DNA helicase | 82705  | 6  | 13 | 0  | 0  |

|                                       |             |       |               |        |   |   |   |   |
|---------------------------------------|-------------|-------|---------------|--------|---|---|---|---|
| PARP-1                                | NP_001609   |       |               | 113135 | 5 |   | 0 | 0 |
| <b>RNAP II and associated factors</b> |             |       |               |        |   |   |   |   |
| Pol II large subunit<br>Rpb1          | NP_000928.1 | RPB1  | Polymerase    | 217204 | 2 | 2 | 2 | 0 |
| Pol II B                              | NP_000929.1 | RPB2  |               | 133896 |   | 2 | 4 | 0 |
| Rpb5 (Pol II E)                       | NP_002686.2 | RPB5  |               | 24611  | 2 |   | 0 | 0 |
| Rpb11                                 | AF468111_1  | RPB11 |               | 17208  |   | 2 | 0 | 0 |
| <b>Transcription Factors</b>          |             |       |               |        |   |   |   |   |
| TF II, I                              | NP_127492.1 |       |               | 112416 | 8 | 2 | 0 | 0 |
| TAF15                                 | AAH46099.1  |       | RRM, zf-RanBP | 52061  | 6 | 5 | 0 | 0 |
| <b>Integrator Complex</b>             |             |       |               |        |   |   |   |   |
| INTS2                                 | NP_065799.1 |       |               | 134346 | 2 | 2 | 0 | 0 |
| INTS3                                 | NP_075391.3 |       |               | 118013 | 4 | 9 | 0 | 0 |
| INTS4                                 | NP_291025.3 |       |               | 108171 | 2 | 3 | 0 | 0 |
| INTS6                                 | NP_036273.1 |       |               | 100390 | 2 | 3 | 0 | 0 |
| INTS7                                 | NP_056249.1 |       |               | 106834 | 2 | 2 | 0 | 0 |
| INTS8                                 | NP_060334.2 |       |               | 113088 |   | 3 | 0 | 0 |
| INTS9                                 | NP_060720.1 |       | YSH1 homology | 73815  |   | 4 | 0 | 0 |
| INTS10                                | NP_060612.2 |       |               | 82236  |   | 2 | 0 | 0 |
| <b>PAF Complex</b>                    |             |       |               |        |   |   |   |   |
| Cdc73                                 | AAH14351.2  | CDC73 |               | 46675  | 2 | 2 | 0 | 0 |
| <b>FACT Complex</b>                   |             |       |               |        |   |   |   |   |

|                            |             |        |              |        |    |    |   |   |
|----------------------------|-------------|--------|--------------|--------|----|----|---|---|
| FACT complex large subunit | NP_009123   | SPT16  |              | 119914 | 4  | 4  | 0 | 0 |
| <b>Splicing Factors</b>    |             |        |              |        |    |    |   |   |
| p54nrb                     | NP_031389.3 |        |              | 54232  | 11 | 3  | 2 | 0 |
| PSF                        | NP_005057.1 |        |              | 76150  | 10 | 4  | 3 | 0 |
| PUF60                      | NP_510965.1 |        | RRMs         | 59876  | 3  | 9  | 0 | 0 |
| UAP56                      | NP_004631.1 | SUB2   | RNA Helicase | 48991  | 12 | 9  | 3 | 0 |
| SF1                        | NP_004621.2 | BBP    |              | 68330  | 5  | 5  | 0 | 0 |
| SF3A, subunit 1            | NP_005868.1 | PRP21  | Surp         | 88886  | 9  | 15 | 0 | 0 |
| SF3A, subunit 2            | NP_009096.2 | PRP11  |              | 49256  | 2  | 4  | 0 | 0 |
| SF3A60                     | CAA57388    | PRP9   |              | 58777  | 3  | 18 | 0 | 0 |
| SF3B, subunit 1            | NP_036565.2 | HSH155 |              | 145830 | 16 | 34 | 5 | 0 |
| SF3B, subunit 2            | NP_006833.2 | CUS1   |              | 100228 | 2  | 21 | 3 | 0 |
| SF3B, subunit 4            | NP_005841.1 | HSH49  |              | 44386  | 3  | 5  | 0 | 0 |
| SF3B, 14 kDa               | NP_057131.1 | SNU17  |              | 14585  |    | 5  | 0 | 0 |
| Prpf38b                    | NP_060531.1 |        |              | 64441  | 2  | 8  | 0 | 0 |
| SRm300                     | NP_057417.2 |        | RS           | 299676 | 13 | 15 | 0 | 0 |
| U1 70K                     | NP_003080.2 | SNP1   | RRM          | 51557  | 7  | 7  | 3 | 0 |
| U2AF65                     | NP_009210.1 | MUD2   | RRM          | 53501  | 6  | 11 | 0 | 0 |
| U2AF35                     | NP_006749.1 |        | RRM          | 27872  | 2  | 3  | 0 | 0 |
| PRP19                      | NP_055317.1 | PRP19  | RING, WD     | 55181  | 5  | 3  | 6 | 0 |
| <b>Exosome</b>             |             |        |              |        |    |    |   |   |
| SKIV2L2 (hMTR4)            | NP_056175.2 | MTR4   | DEXD         | 117933 | 29 | 28 | 0 | 0 |
| <b>Translation Factors</b> |             |        |              |        |    |    |   |   |

|                                                          |             |         |          |        |    |    |   |   |
|----------------------------------------------------------|-------------|---------|----------|--------|----|----|---|---|
| eEF1-alpha                                               | NP_001393.1 | TEF1/2  | GTPase   | 50141  | 14 | 12 | 5 | 0 |
| eEF1-gamma                                               | NP_001395.1 | TEF4    | GST      | 50119  | 5  | 4  | 0 | 0 |
| eIF2A                                                    | NP_114414.2 | YGR054W |          | 64990  | 4  | 4  | 0 | 0 |
| eIF 4A                                                   | NP_001407.1 | TIF1    | Helicase | 46154  | 12 | 6  | 0 | 0 |
| eIF3 gamma                                               | NP_003747.1 |         | JAB/MPN  | 39930  | 5  | 6  | 0 | 0 |
| eIF3S2                                                   | NP_003748.1 | TIF34   | WD       | 36502  | 2  | 2  | 0 | 0 |
| eIF3S5                                                   | NP_003745.1 |         | PCI      | 37564  | 3  | 2  | 0 | 0 |
| eIF3S6                                                   | NP_001559.1 |         |          | 52221  | 2  | 4  | 0 | 0 |
| eIF3S9 eta                                               | NP_003742.2 |         | RRM      | 92482  | 7  | 7  | 0 | 0 |
| eIF3A                                                    | NP_003741.1 | RPG1    |          | 166569 | 16 | 9  | 0 | 0 |
| eIF4G1                                                   | NP_886553.2 | TIF4631 |          | 175460 | 2  | 2  | 0 | 0 |
| RACK1/GNB2L1/lung cancer oncogene 7                      | NP_006089.1 | ASC1    | WD       | 35077  | 5  | 5  | 0 | 0 |
| <b>Factors with known motifs</b>                         |             |         |          |        |    |    |   |   |
| RNA binding motif protein 7                              | NP_057174.1 |         | RRM      | 30503  | 4  | 4  | 0 | 0 |
| RNA binding motif protein 9/Ataxin-binding protein/Fox-1 | NP_055124   |         | RRM      | 39515  | 2  | 7  | 0 | 0 |
| RNA binding motif protein 25                             | NP_067062.1 |         | RRM      | 100186 | 4  | 16 | 0 | 0 |
| RNA binding motif protein 39, isoform a                  | NP_909122.1 |         | RRM      | 59380  | 2  | 4  | 2 | 0 |
| RNA binding motif protein 39, isoform b                  | NP_004893.1 |         | RRM      | 58657  | 2  | 4  | 2 | 0 |



|                                                                      |             |                  |                                       |        |    |    |   |   |
|----------------------------------------------------------------------|-------------|------------------|---------------------------------------|--------|----|----|---|---|
| DEAH box polypeptide 3                                               | NP_001347.3 | DBP1             | RNA helicase                          | 7244   | 13 | 9  | 0 | 0 |
| DEAH box polypeptide 5                                               | NP_004387.1 | DBP2             | RNA helicase                          | 69148  | 4  | 5  | 0 | 0 |
| DEAH box polypeptide 9                                               | NP_001348.2 |                  | RNA helicase                          | 140958 | 32 | 3  | 0 | 0 |
| DEAH box polypeptide 15                                              | NP_001349.2 | PRP43            | RNA helicase                          | 90933  | 3  | 17 | 0 | 0 |
| DEAH box polypeptide 36                                              | NP_065916.1 |                  | RNA helicase                          | 114776 | 12 | 27 | 0 | 0 |
| DEAH box polypeptide 39                                              | NP_005795.2 |                  | RNA helicase                          | 49130  | 8  | 5  | 0 | 0 |
| DEAD box polypeptide 6                                               | NP_004388.1 | DHH1             | RNA helicase                          | 82432  | 3  | 2  | 0 | 0 |
| DEAD box polypeptide 17 (p82)                                        | NP_006377.2 |                  | RNA helicase                          | 80273  | 6  | 4  | 0 | 0 |
| Gemin3 (DEAD box polypeptide 20)                                     | NP_009135.3 |                  | RNA helicase                          | 92213  | 4  | 2  | 0 | 0 |
| DEAD box polypeptide 23                                              | NP_004809.2 | PRP28 (S. Pombe) | RNA helicase                          | 95583  | 4  | 5  | 0 | 0 |
| ZCCHC8                                                               | NP_060082   |                  | Zinc finger                           | 79375  | 15 | 16 | 0 | 0 |
| EBNA2 coactivator, p100/SND1                                         | NP_055205.2 |                  | Staphylococcal nuclease domain, Tudor | 101997 | 12 | 2  | 0 | 0 |
| Interferon-induced protein with tetratricopeptide repeats 1 isform 2 | NP_001539.3 |                  | TPR                                   | 55360  | 9  | 7  | 0 | 0 |

|                                                               |             |  |                  |       |   |   |   |   |
|---------------------------------------------------------------|-------------|--|------------------|-------|---|---|---|---|
| Interferon-induced protein with tetratricopeptide repeats 3   | NP_001540   |  | TPR              | 55985 | 8 | 5 | 0 | 0 |
| <b>Other Factors</b>                                          |             |  |                  |       |   |   |   |   |
| G3BP/Ras-GTPase-activating protein SH3-domain-binding protein | NP_005745.1 |  | Endoribonuclease | 52164 | 5 | 2 | 0 | 0 |
| JUP protein/ gamma-catenin                                    | NP_002221.1 |  |                  | 81745 | 5 | 3 | 0 | 0 |
| PNUTS (PPP1R10)                                               | NP_002705.2 |  | PP1 regulator    | 99058 | 6 | 9 | 0 | 0 |
